# Supplementary material for: CO2 Capture Membrane for Long-Cycle Lithium-Air Battery
Source: MDPI journal article supplement (doi:10.3390/molecules28052024), 2023-02-21
Supplement: s1 [file s1]

**Supporting Information**

**CO<sub>2</sub> Capture Membrane for Long-Cycle Lithium-Air Battery**

Jiawei Wang, Yanli Chen\*, Yunfeng Zhao, Chongyan Yao, Yibo Liu, and Xizheng Liu\*

*Tianjin Key Laboratory of Advanced Functional Porous Materials, New-energy Materials and  
Low-carbon Technologies, School of Materials Science and Engineering, Tianjin 300384, China.*

**Correspondings:** yanlichen@mail.tjut.edu.cn; xzliu@tjut.edu.cn

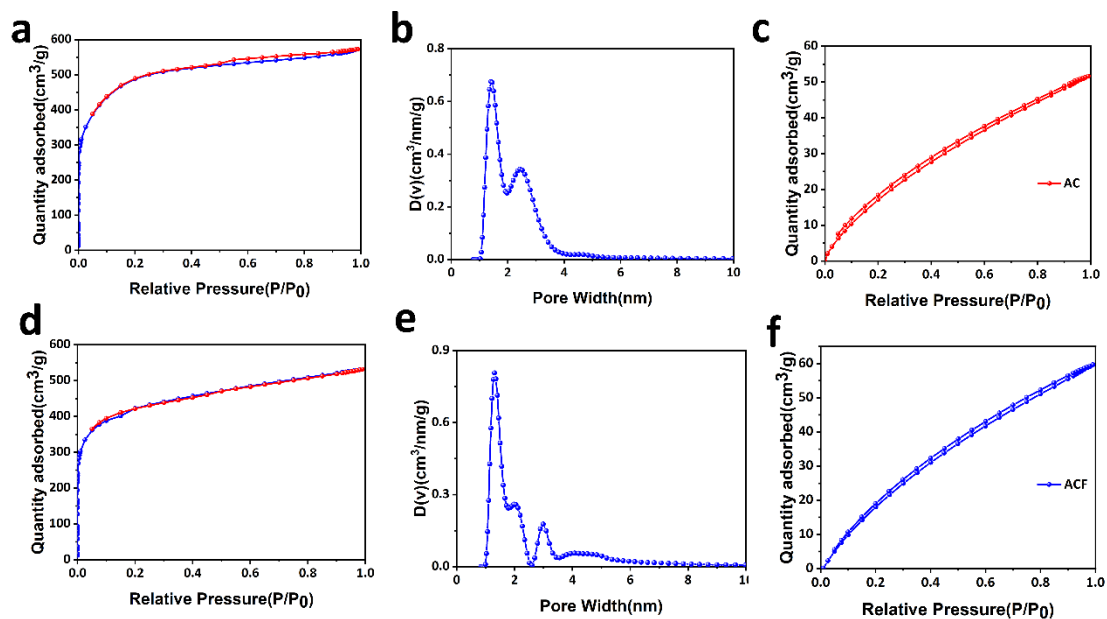

**Figure. S1** (a) the  $N_2$  adsorption-desorption isotherms of activated carbon. (b) the pore distribution curve of activated carbon. (c) the  $CO_2$  adsorption-desorption isotherm of activated carbon at 298 K. (d) the  $N_2$  adsorption-desorption isotherms of activated carbon fiber felt. (e) the pore distribution curve of activated carbon fiber felt. (f) the  $CO_2$  adsorption-desorption isotherm of activated carbon fiber felt at 298 K.

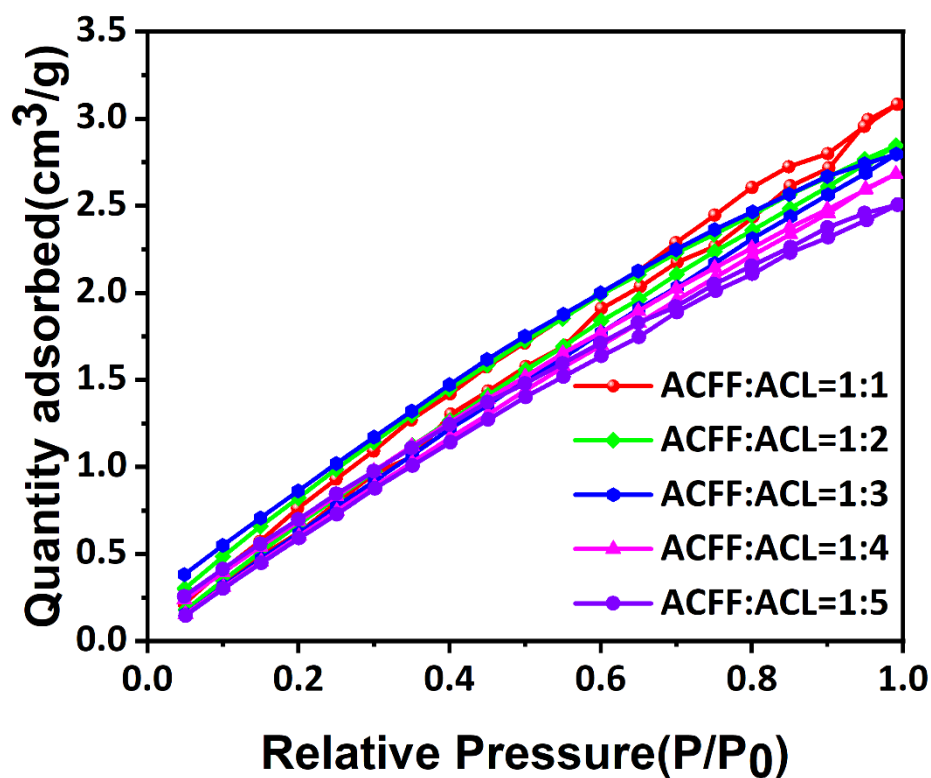

**Figure. S2** the N<sub>2</sub> adsorption-desorption isotherms of CCMs at 298 K.

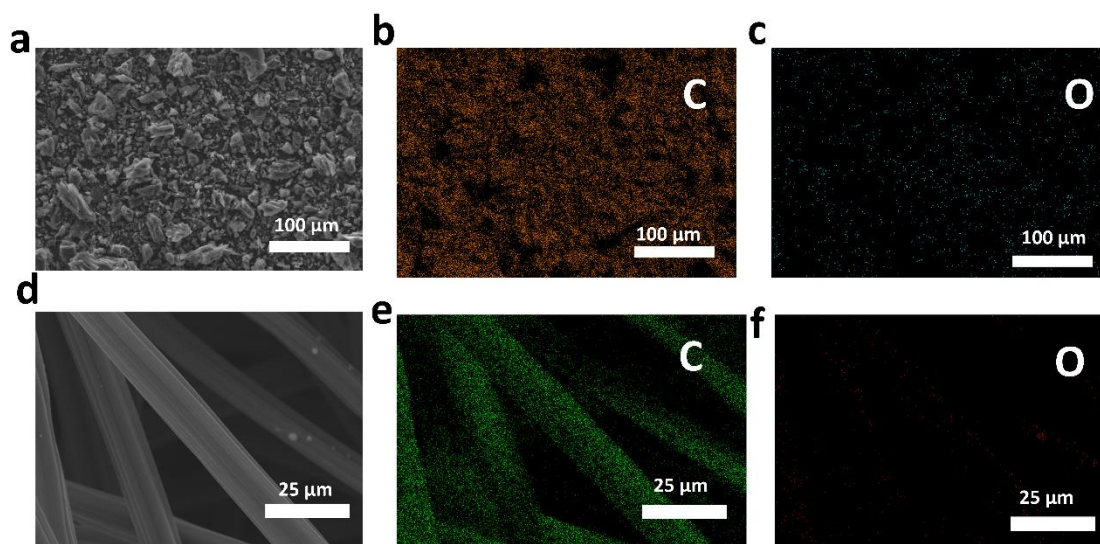

**Figure. S3** morphology characterization of activated carbon and activated carbon fiber. (a) surface morphology of activated carbon by SEM. (b) their corresponding carbon element distribution mapping image. (c) their corresponding oxygen element distribution mapping image. (d) surface morphology of activated carbon fiber by SEM. (e) their corresponding carbon element distribution mapping image. (f) their corresponding oxygen element distribution mapping image.

morphology of activated carbon fiber felt by SEM. (e) their corresponding carbon element distribution mapping image. (f) their corresponding oxygen element distribution mapping image.

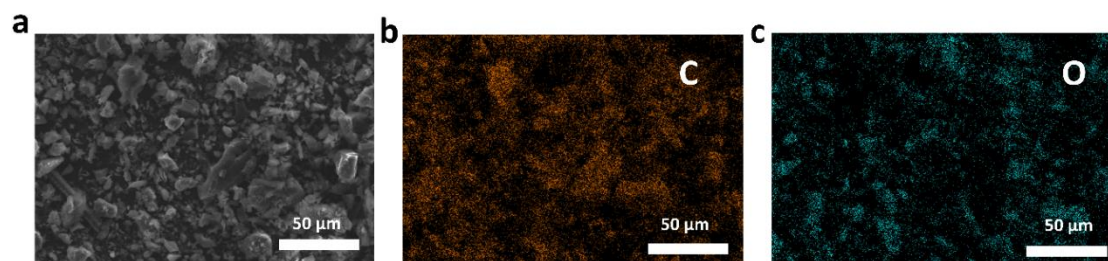

**Figure. S4** Morphology characterization of LiOH@AC. (a) surface morphology, (b) carbon and (c) oxygen element distribution mapping images.

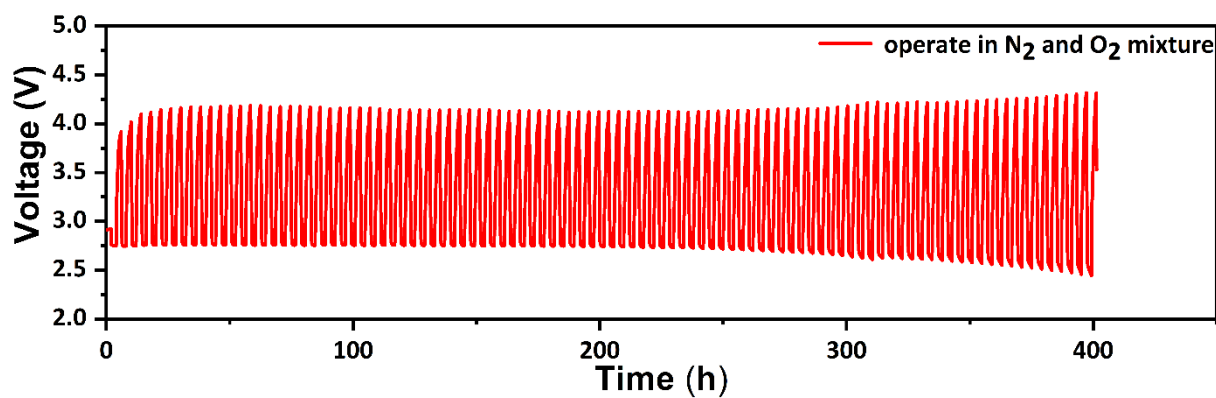

**Figure. S5** Electrochemical voltage-time profile of ALB operating in N<sub>2</sub> and O<sub>2</sub> mixture.

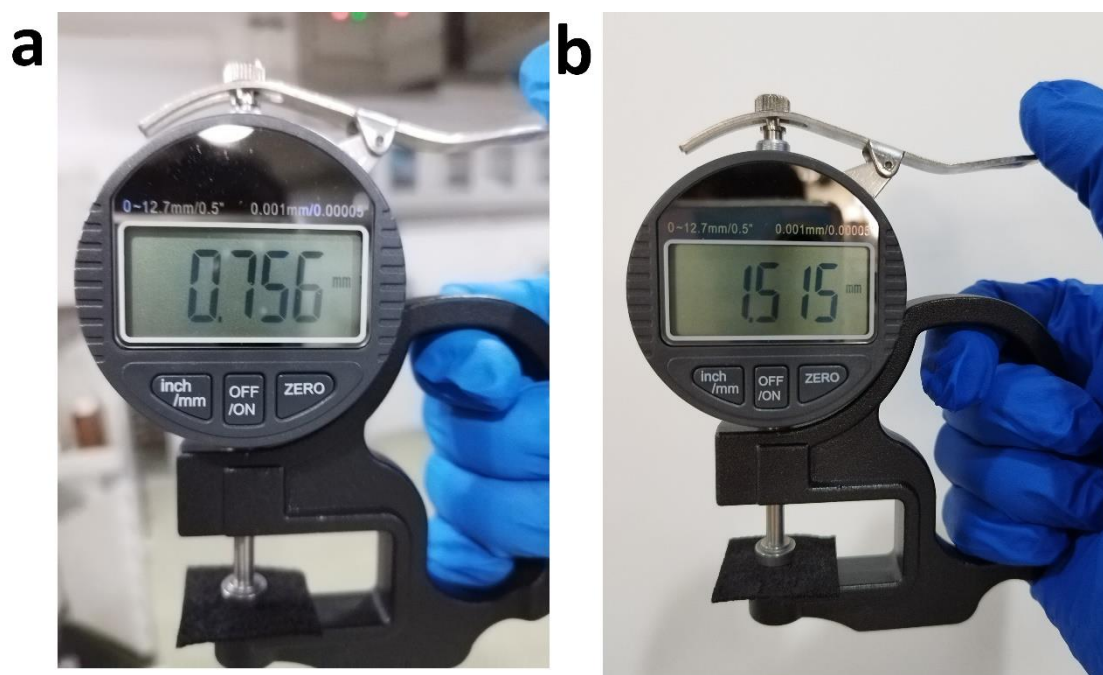

**Figure S6** (a) Thickness of ACFF. (b) Thickness of CCM.

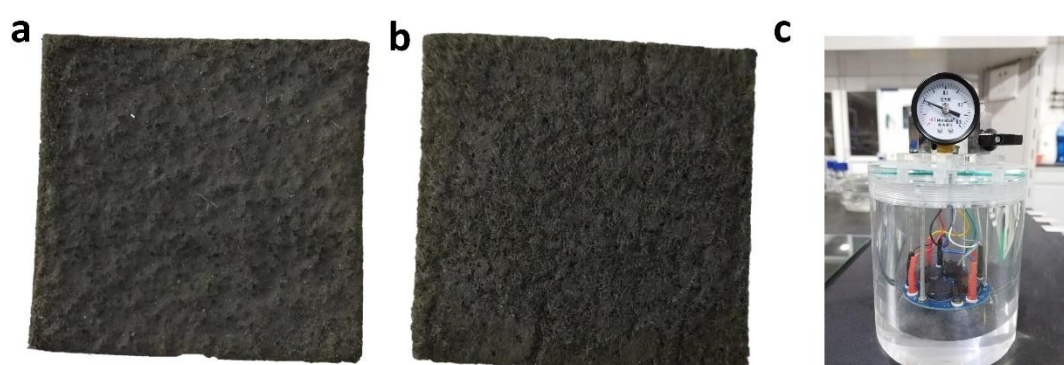

**Figure S7** (a) One side of CCM. (b) The other side of CCM. (c) The picture of battery test device.

**Table S1** Pore volume and BET specific surface area of AC and ACFF.

|      | Pore Volume (cm <sup>3</sup> /g) | BET Surface area (m <sup>2</sup> /g) | DFT Surface area (m <sup>2</sup> /g) |
|------|----------------------------------|--------------------------------------|--------------------------------------|
| ACFF | 0.821                            | 1761                                 | 1652                                 |

**Table S2** Pore Volume and BET specific surface area of LiOH@AC with different content of LiOH.

|            | <b>Pore Volume (cm<sup>3</sup> g<sup>-1</sup>)</b> | <b>BET Surface area (m<sup>2</sup> g<sup>-1</sup>)</b> |
|------------|----------------------------------------------------|--------------------------------------------------------|
| <b>10%</b> | 0.653                                              | 1403                                                   |
| <b>20%</b> | 0.604                                              | 1276                                                   |
| <b>30%</b> | 0.514                                              | 1061                                                   |
| <b>40%</b> | 0.481                                              | 1007                                                   |
| <b>50%</b> | 0.408                                              | 789                                                    |
